# Supplementary material
Source: PubMed Central journal article supplement (PMC5747364)
Supplement: NIHMS925589-supplement-Full_reference_list.pdf [file NIHMS925589-supplement-Full_reference_list.pdf]

## Full reference list

1. R. A. Saxton, D. M. Sabatini, mTOR Signaling in Growth, Metabolism, and Disease. *Cell* **168**, 960-976 (2017).
2. C. C. Dibble, B. D. Manning, Signal integration by mTORC1 coordinates nutrient input with biosynthetic output. *Nat Cell Biol* **15**, 555-564 (2013).
3. J. L. Jewell, R. C. Russell, K. L. Guan, Amino acid signalling upstream of mTOR. *Nature reviews. Molecular cell biology* **14**, 133-139 (2013).
4. Y. Sancak *et al.*, The Rag GTPases bind raptor and mediate amino acid signaling to mTORC1. *Science* **320**, 1496-1501 (2008).
5. E. Kim, P. Goraksha-Hicks, L. Li, T. P. Neufeld, K. L. Guan, Regulation of TORC1 by Rag GTPases in nutrient response. *Nat Cell Biol* **10**, 935-945 (2008).
6. Z. Y. Tsun *et al.*, The folliculin tumor suppressor is a GAP for the RagC/D GTPases that signal amino acid levels to mTORC1. *Mol Cell* **52**, 495-505 (2013).
7. L. Bar-Peled *et al.*, A Tumor suppressor complex with GAP activity for the Rag GTPases that signal amino acid sufficiency to mTORC1. *Science* **340**, 1100-1106 (2013).
8. Y. Sancak *et al.*, Ragulator-Rag complex targets mTORC1 to the lysosomal surface and is necessary for its activation by amino acids. *Cell* **141**, 290-303 (2010).
9. L. Bar-Peled, L. D. Schweitzer, R. Zoncu, D. M. Sabatini, Ragulator is a GEF for the rag GTPases that signal amino acid levels to mTORC1. *Cell* **150**, 1196-1208 (2012).
10. R. L. Wolfson *et al.*, KICSTOR recruits GATOR1 to the lysosome and is necessary for nutrients to regulate mTORC1. *Nature* **543**, 438-442 (2017).
11. M. Peng, N. Yin, M. O. Li, SZT2 dictates GATOR control of mTORC1 signalling. *Nature* **543**, 433-437 (2017).
12. S. Wang *et al.*, Metabolism. Lysosomal amino acid transporter SLC38A9 signals arginine sufficiency to mTORC1. *Science* **347**, 188-194 (2015).
13. M. Rebsamen *et al.*, SLC38A9 is a component of the lysosomal amino acid sensing machinery that controls mTORC1. *Nature* **519**, 477-481 (2015).
14. J. Jung, H. M. Genau, C. Behrends, Amino Acid-Dependent mTORC1 Regulation by the Lysosomal Membrane Protein SLC38A9. *Mol Cell Biol* **35**, 2479-2494 (2015).
15. G. Wyant *et al.*, mTORC1 activator SLC38A9 is required to efflux essential amino acids from lysosomes and use protein as a nutrient. *Cell* **In Press**.
16. R. L. Wolfson *et al.*, Sestrin2 is a leucine sensor for the mTORC1 pathway. *Science* **351**, 43-48 (2016).
17. R. A. Saxton *et al.*, Structural basis for leucine sensing by the Sestrin2-mTORC1 pathway. *Science* **351**, 53-58 (2016).
18. R. A. Saxton, L. Chantranupong, K. E. Knockenhauer, T. U. Schwartz, D. M. Sabatini, Mechanism of arginine sensing by CASTOR1 upstream of mTORC1. *Nature* **536**, 229-233 (2016).
19. L. Chantranupong *et al.*, The CASTOR Proteins Are Arginine Sensors for the mTORC1 Pathway. *Cell* **165**, 153-164 (2016).
20. E. L. Huttlin *et al.*, Architecture of the human interactome defines protein communities and disease networks. *Nature* **545**, 505-509 (2017).
21. L. Chantranupong *et al.*, The Sestrins interact with GATOR2 to negatively regulate the amino-acid-sensing pathway upstream of mTORC1. *Cell Rep* **9**, 1-8 (2014).

22. A. Parmigiani *et al.*, Sestrins inhibit mTORC1 kinase activation through the GATOR complex. *Cell Rep* **9**, 1281-1291 (2014).
23. A. Hildebrand, M. Remmert, A. Biegert, J. Soding, Fast and accurate automatic structure prediction with HHpred. *Proteins* **77 Suppl 9**, 128-132 (2009).
24. P. Z. Kozbial, A. R. Mushegian, Natural history of S-adenosylmethionine-binding proteins. *BMC Struct Biol* **5**, 19 (2005).
25. S. J. Mentch *et al.*, Histone Methylation Dynamics and Gene Regulation Occur through the Sensing of One-Carbon Metabolism. *Cell Metab* **22**, 861-873 (2015).
26. C. L. Quinlan *et al.*, Targeting S-adenosylmethionine biosynthesis with a novel allosteric inhibitor of Mat2A. *Nat Chem Biol* **13**, 785-792 (2017).
27. T. Wang *et al.*, Gene Essentiality Profiling Reveals Gene Networks and Synthetic Lethal Interactions with Oncogenic Ras. *Cell* **168**, 890-903 e815 (2017).
28. T. Wang *et al.*, Identification and characterization of essential genes in the human genome. *Science* **350**, 1096-1101 (2015).
29. M. Gossen, H. Bujard, Tight control of gene expression in mammalian cells by tetracycline-responsive promoters. *Proc Natl Acad Sci U S A* **89**, 5547-5551 (1992).
30. J. W. Locasale, Serine, glycine and one-carbon units: cancer metabolism in full circle. *Nat Rev Cancer* **13**, 572-583 (2013).
31. J. A. Law, S. E. Jacobsen, Establishing, maintaining and modifying DNA methylation patterns in plants and animals. *Nat Rev Genet* **11**, 204-220 (2010).
32. C. Ye, B. M. Sutter, Y. Wang, Z. Kuang, B. P. Tu, A Metabolic Function for Phospholipid and Histone Methylation. *Mol Cell* **66**, 180-193 e188 (2017).
33. B. M. Sutter, X. Wu, S. Laxman, B. P. Tu, Methionine inhibits autophagy and promotes growth by inducing the SAM-responsive methylation of PP2A. *Cell* **154**, 403-415 (2013).
34. N. Orentreich, J. R. Matias, A. DeFelice, J. A. Zimmerman, Low methionine ingestion by rats extends life span. *J Nutr* **123**, 269-274 (1993).
35. R. A. Miller *et al.*, Methionine-deficient diet extends mouse lifespan, slows immune and lens aging, alters glucose, T4, IGF-I and insulin levels, and increases hepatocyte MIF levels and stress resistance. *Aging Cell* **4**, 119-125 (2005).
36. L. Sun, A. A. Sadighi Akha, R. A. Miller, J. M. Harper, Life-span extension in mice by preweaning food restriction and by methionine restriction in middle age. *J Gerontol A Biol Sci Med Sci* **64**, 711-722 (2009).
37. H. M. Brown-Borg *et al.*, Growth hormone signaling is necessary for lifespan extension by dietary methionine. *Aging Cell* **13**, 1019-1027 (2014).
38. D. Wanders *et al.*, Role of GCN2-Independent Signaling Through a Noncanonical PERK/NRF2 Pathway in the Physiological Responses to Dietary Methionine Restriction. *Diabetes* **65**, 1499-1510 (2016).
39. O. Boussif *et al.*, A versatile vector for gene and oligonucleotide transfer into cells in culture and in vivo: polyethylenimine. *Proc Natl Acad Sci U S A* **92**, 7297-7301 (1995).
40. S. Sharma, P. Watzinger, P. Kotter, K. D. Entian, Identification of a novel methyltransferase, Bmt2, responsible for the N-1-methyl-adenosine base modification of 25S rRNA in *Saccharomyces cerevisiae*. *Nucleic Acids Res* **41**, 5428-5443 (2013).
41. D. H. Kim *et al.*, mTOR interacts with raptor to form a nutrient-sensitive complex that signals to the cell growth machinery. *Cell* **110**, 163-175 (2002).

42. K. Birsoy *et al.*, An Essential Role of the Mitochondrial Electron Transport Chain in Cell Proliferation Is to Enable Aspartate Synthesis. *Cell* **162**, 540-551 (2015).
43. W. W. Chen, E. Freinkman, T. Wang, K. Birsoy, D. M. Sabatini, Absolute Quantification of Matrix Metabolites Reveals the Dynamics of Mitochondrial Metabolism. *Cell* **166**, 1324-1337 e1311 (2016).
