# Supplementary material
Source: PubMed Central journal article supplement (PMC5747364)
Supplement: NIHMS925589-supplement-Supp_figure_2.pdf [file NIHMS925589-supplement-Supp_figure_2.pdf]

# Figure S2

## A

|                                |     |                                                                                                                                                                                |     |
|--------------------------------|-----|--------------------------------------------------------------------------------------------------------------------------------------------------------------------------------|-----|
| <i>Homo sapiens</i>            | 1   | MEPGAGGRNTARAQRAG--SPNTPP--PREQERKLEQEKLSGVVKSVHRRLRKKYREVGDFDKIWRHEHC--EDEETLCEYAVAMKNLA                                                                                      | 82  |
| <i>Pan troglodytes</i>         | 1   | MEPGAGGRNTARGQRAG--SPNTPP--PREQERKLEQEKLSGVVKSVHRRLRKKYREVGDFDKIWRHEHC--EDEETLCEYAVAMKNLA                                                                                      | 82  |
| <i>Macaca mulatta</i>          | 1   | MEPGAGGRSTARGQRAG--PPNTPP--PREQERKLEQEKLSGVVKSVHRRLRKKYREVGDFDKIWRHEHC--EDEETLCEYAVAMKNLA                                                                                      | 82  |
| <i>Callithrix jacchus</i>      | 1   | MEPGAGGRSTARGQKAG--HPNTPP--PREQERKLEQEKLSGVVKSVHRRLRKKYREVGDFDKIWRHEHC--EDEETLCEYAVAMKNLA                                                                                      | 82  |
| <i>Mus musculus</i>            | 1   | MEPGGGRGAARGQR----PPNAAQ--PREQERKLEQEKLSGVVKSVHRRLRKKYREVGDFDKIWRHEHC--EAE TLCEYAVAMKNLA                                                                                       | 80  |
| <i>Gallus gallus</i>           | 1   | MEAPRSRPRPGGAASPPPPPPP--PPEQERKLEQEKLSGVVKSVHRRLRKKYREVGDFDKIWRHEHC--EDEETLCEYAVAMKNLA                                                                                         | 84  |
| <i>Xenopus tropicalis</i>      | 1   | MEPV LQARGKRENV L GNAREERCVP G FFSACEQKLEQEKLSGVVKRVHRDLRKKYREAGDFEKIWLHEHC--KDKGR LCEYAVAMKLA                                                                                 | 86  |
| <i>Danio rerio</i>             | 1   | MDLRSSAETDP---DLSENHPGSVP--AELQSRKQEQEKLSGVVKSVHRRLRKKYREVGDFDKIWRHEHC--EAE TLCEYAVAMKNLA                                                                                      | 81  |
| <i>Drosophila melanogaster</i> | 1   | -----MA TEHQRLASIVKSCHESLRQLTKYEG-ATAAWQEH TSPRNAKQLAEYAKAMKQLA                                                                                                                | 56  |
| <i>Hydra vulgaris</i>          | 1   | -----K FFMFTMD---EATKNAEVVKLHKT LRSKVKKGYPPDEVANLL--KSDV LSEYKAMSILA                                                                                                           | 60  |
| <i>Homo sapiens</i>            | 83  | ----DNHWAKTCEGEGRI EWCCSVCREY FQNGGKRKALEKDEKRAVLATK--TPPALNMHESSQL EGH LTNLSFTNPEFIT-ELLQAS                                                                                   | 163 |
| <i>Pan troglodytes</i>         | 83  | ----DNHWAKTCEGEGRI EWCCSVCREY FQNGGKRKALEKDEKRAVLATK--TPPALNMHESSQL EGH LTNLSFTNPEFIT-ELLQAS                                                                                   | 163 |
| <i>Macaca mulatta</i>          | 83  | ----DNHWAKTCEGEGRI EWCCSVCREY FQNGGKRKALEKDEKRAVLATK--TPPALNMHESSQL EGH LTNLSFTNPEFIT-ELLQAS                                                                                   | 163 |
| <i>Callithrix jacchus</i>      | 83  | ----DNHWAKTCEGEGRI EWCCSVCREY FQNGGKRKALEKDEKRAVLATK--TPPALNMHESSQL EGH LTNLSFTNPEFIT-ELLQAS                                                                                   | 163 |
| <i>Mus musculus</i>            | 81  | ----DNHWAKTCEGEGRI EWCCSVCREY FQNGGKRKALEKDEKRAVLATK--TPPALNVHESSQL EGH LTNLSFTNPEFIT-ELLQAS                                                                                   | 161 |
| <i>Gallus gallus</i>           | 85  | ----DNHWAKTCEGEGRI EWCCSVCREY FQNGGKRKALEKDEKRAL LASK--STPALNASQPPKI EDPLPNFGLTNHEAITEEL LHS L                                                                                 | 166 |
| <i>Xenopus tropicalis</i>      | 87  | ----DNHWAKKCEGEGRI EWCLGVQCEY F FNGGKKALEK DARRATLICKRYV TSPINNTEQTNHGEFPTLENSKQDFV L-KLKYMT                                                                                   | 169 |
| <i>Danio rerio</i>             | 82  | ----DNHWANKCEGEGRI EWCRSVQCEY FQDGGMRRLVLEKDEKRAVLATK--GNANTDTNAPPQLSSISTSTF-----QL                                                                                            | 151 |
| <i>Drosophila melanogaster</i> | 57  | A IWE TNDGKVELQARSRIKWAIDYITKYFFTEGIY--LQKRQREQLL-----ESYRAEGKL-----GEVQCR LMEEPP                                                                                              | 123 |
| <i>Hydra vulgaris</i>          | 61  | ----LQYMPKD-TSQSRIKWAYNVCL EYFNGGAYKSAQKYF KQMYSSLEKNI--VTEYEKLTIESELRI FERDWKSLITE-----                                                                                       | 135 |
| <i>Homo sapiens</i>            | 164 | GKIRLLDVGSCFNPFLKFEELFTVGI D IVP AVESVYKCDFLNLQLQQP LQ- LAQDA I DAFLKQLKNPIDS L PGE-L FHVVV FSL LLSY                                                                           | 249 |
| <i>Pan troglodytes</i>         | 164 | GKIRLLDVGSCFNPFLKFEELFTVGI D IVP AVESVYKCDFLNLQLQQP LQ- LAQDA I DAFLKQLKNPIDS L PGE-L FHVVV FSL LLSY                                                                           | 249 |
| <i>Macaca mulatta</i>          | 164 | GKIRLLDVGSCFNPFLKFEELFTVGI D IVP AVESVYKCDFLNLQLQQP LQ- LAQDA I DAFLKQLKNPIDS L PGE-L FHVVV FSL LLSY                                                                           | 249 |
| <i>Callithrix jacchus</i>      | 164 | GKIRLLDVGSCFNPFLKFEELFTVGI D IVP AVESVYKCDFLNLQLQQP LQ- LAQDA I DAFLKQLKNPIDS L PGE-L FHVVV FSL LLSY                                                                           | 249 |
| <i>Mus musculus</i>            | 162 | GKIRLLDVGSCFNPFLKFEELFTVGI D IVP AVESVYKCDFLNLQLQQP LQ- LAQDA I DAFLKQLRNPIDA L PGE-L FHVVV FSL LLSY                                                                           | 247 |
| <i>Gallus gallus</i>           | 167 | GKIRLLDVGSCFNPFLKFEELFTVGI D IVP AVESVYKCDFLNLQLQQP LQ- LAQDA I DAFLKQLKNPIDS L PGE-L FHVVV FSL LLSY                                                                           | 252 |
| <i>Xenopus tropicalis</i>      | 170 | GKIRLLDVGSCYNPFLKYEDFLAVG I D IVP AVETVCKCDFLNLQIQRP LQ- FAPDA I DAFLKQLESPI DYPAE-L FHVVV FSL LLSY                                                                            | 255 |
| <i>Danio rerio</i>             | 152 | GRIRLLDVGSCFNPFLKFEELFTVGI D IVP AVESVYKCDFLNLQLQQP LQ- LASDALDAFLRQLRGPIDA L PGE-L FHVVV FSL LLSY                                                                             | 237 |
| <i>Drosophila melanogaster</i> | 124 | DR LHVLDVGSCFNPFS SAPHLEVALDLC ATE DVLQADFLKVEV---VPGIREPELE-----EGSVRR PA-SHYECV L FSL LLEY                                                                                   | 201 |
| <i>Hydra vulgaris</i>          | 136 | -K I V LLDVGSCFNGEKEFNEFLVFP I D I A P A TQD VYK L D F L N V A F K E V S S F T S D Q F T L V T Y I R D N L T D S L L K A V D V V V F S L L L C Y                               | 222 |
| <i>Homo sapiens</i>            | 250 | F P S P Y Q R W I C C K K A H E L L V L N G L L L I I T P D S S H Q N R H A M M K S W K I A I E S L G F K R F K Y S K F S H M H L M A F R X I S L K T T S D L V S R N Y P G M  | 337 |
| <i>Pan troglodytes</i>         | 250 | F P S P Y Q R W I C C K K A H E L L V L N G L L L I I T P D S S H Q N R H A M M K S W K I A I E S L G F K R F K Y S K F S H M H L M A F R X I S L K T T S D L V S R N Y P G M  | 337 |
| <i>Macaca mulatta</i>          | 250 | F P S P Y Q R W I C C K K A H E L L V L N G L L L I I T P D S S H Q N R H A M M K S W K I A I E S L G F K R F K Y S K F S H M H L M A F R X I S L K T T S D L V S R N Y P G M  | 337 |
| <i>Callithrix jacchus</i>      | 250 | F P S P Y Q R W I C C K K A H E L L V L N G L L L I I T P D S S H Q N R H A M M K S W K I A I E S L G F K R F K Y S K F S H M H L M A F R X I S L K T T S D L V S R N Y P G M  | 337 |
| <i>Mus musculus</i>            | 248 | F P S P Y Q R W I C C K K A H E L L V L N G L L L I I T P D S S H Q N R H A M M K S W K I A I E S L G F K R F K Y S K F S H M H L M A F R X I S L K T T S D L V S R N Y P G M  | 335 |
| <i>Gallus gallus</i>           | 253 | F P S P Y Q R W I C C K K A H E L L V L N G L L L V I T P D S S H Q N R H A M M K S W K I A I E S L G F K R F K Y S K F S H M H L M A F R X I S L Q T T S D L V S R N Y P G M  | 340 |
| <i>Xenopus tropicalis</i>      | 256 | F P S P Y Q R W I C C K K A H E L L T L N G L L L I I T P D S S H Q N R H A M M K S W K I A I E S L G F R M T Y S K F S H M H L M A F R X I S L K T T S D L I T M N Y P G M    | 343 |
| <i>Danio rerio</i>             | 238 | F P S P Y Q R W L C C K K A H E L L T L N G L L L I I T P D S S H Q G R H A L M M R S W R V A V E S L G F K R Y K Y V K F S H M H L I A F R X V S P T T S D L V S R N Y P E M  | 325 |
| <i>Drosophila melanogaster</i> | 202 | M P S A E Q R L Q C C L O A Y D L L L P E G L L V L I T P D S S H V G K N A H L M K N W R Y S L A R I G L L R V R F E K L P H I S C M F R X A -----I S R E-----                | 277 |
| <i>Hydra vulgaris</i>          | 223 | L P C E Q R L K C C I N A H I S L R L Y G L L I I I T P D S S H Q N R N A K M M A S W K N A L E G I G V F R Y K Y T K L E H F H C M A F F X A N -----E T N I L L W E K Y S R F | 308 |
| <i>Homo sapiens</i>            | 338 | L Y I P Q D F N S I E D E E Y S N P S C Y --V R S D I E D E Q L --A Y G F T E L P D A P Y D S D S G E S Q A S S I P F Y E L E D P I L L L S                                    | 405 |
| <i>Pan troglodytes</i>         | 338 | L Y I P Q D F N S I E D E E Y S N P S C Y --V R S D I E D E Q L --A Y G F T E L P D A P Y D S D S G E S Q A S S I P F Y E L E D P I L L L S                                    | 405 |
| <i>Macaca mulatta</i>          | 338 | L Y I P Q D F N S I E D E E Y S N P S C Y --V R S D I E D E Q L --A Y G F T E L P D A P Y D S D S G E S Q A S S I P F Y E L E D P I L L L S                                    | 405 |
| <i>Callithrix jacchus</i>      | 338 | L Y I P Q D F N S I E D E E Y S N P S C Y --V R S D I E D E Q L --A Y G F T E L P D A P Y D S D S G E S Q A S S I P F Y E L E D P I L L L S                                    | 405 |
| <i>Mus musculus</i>            | 336 | L Y I P Q D F N S V E E E Y S N T S C Y --V R S D L E D E Q L --A Y G F T E L P E A P Y D S D S G E S Q A S S I P F Y E L E D P I L L L S                                      | 403 |
| <i>Gallus gallus</i>           | 341 | L Y I P Q D F N S I E D E E Y S N T S C Y --I R S D M E D E Q L --A Y G F M E L P D A P Y D S D S G E S Q S S I P F Y E L E D P V L L L S                                      | 408 |
| <i>Xenopus tropicalis</i>      | 344 | L Y I P Q D F N Y D G E D Y F S P C C --A R S E L E D E Q L --A C G F T E L P D T P Y D S D S G E S Q N S T M P F Y E F E D P I L L L T                                        | 410 |
| <i>Danio rerio</i>             | 326 | L Y I P Q D F N T F D E D G F A D --C Y E P P R S D F E D D Q M --A C S F A E L P E T P Y D S D S S E S Q S S A P F Y E L E D P I L L Q S                                      | 393 |
| <i>Drosophila melanogaster</i> | 278 | --L S O H W A S I H R E E --G M C E E I R I P Q D D S -----                                                                                                                    | 302 |
| <i>Hydra vulgaris</i>          | 309 | L F I P Q D F Q E I K E K V D I N C S E E K F S S N Y N I E E L I Q V C N L S E L -----                                                                                        | 350 |

## B

|                                          |     |                                                                                                                                                                       |     |
|------------------------------------------|-----|-----------------------------------------------------------------------------------------------------------------------------------------------------------------------|-----|
| <i>Homo sapiens SAMTOR</i>               | 1   | MEPGAGGRNTARAQRAGSPNTPPPREQERKLEQEKLSGVVKSVHRRLRKKYREVGDFDKIWRHECDEEETLCEYAVAMKNLA                                                                                    | 82  |
| <i>Escherichia coli ubiG</i>             | 1   | -----MNAEKSPVNHVDHEEIAKFEAV-----A                                                                                                                                     | 24  |
| <i>Methanococcus maripaludis MMP1179</i> | 1   | -----MSENK K K F D K K G A K N M D E I S K -----                                                                                                                      | 21  |
| <i>Plasmodium falciparum PMT</i>         | 1   | -----M T L I E N L N S D K T F L                                                                                                                                      | 14  |
| <i>Homo sapiens SAMTOR</i>               | 83  | DNHWAKTCEGEGRI EWCCSVCREY FQNGGKRKALEKDEKRAVLATKTTPALNMHESSQL EGH LTNLSFTNPEFITELLQASG                                                                                | 164 |
| <i>Escherichia coli ubiG</i>             | 25  | SRWW-----DLEGEFKPLNRINPLRGLYIAERAG                                                                                                                                    | 53  |
| <i>Methanococcus maripaludis MMP1179</i> | 22  | -----T L F A P I Y P I -----I A E N I                                                                                                                                 | 36  |
| <i>Plasmodium falciparum PMT</i>         | 15  | ENN-QYTDEGVKYYEFIFG--ENYISSGG-----LEATKK--ILSD-----IELNENS-----                                                                                                       | 57  |
| <i>Homo sapiens SAMTOR</i>               | 165 | K I -----R L L D V G S-----C F N P F L K F E E L F T V G I D I V P A V E S V Y K C D F L N L Q L Q Q P L Q L A D A I D A F L K Q L - K N P I D S L P                  | 234 |
| <i>Escherichia coli ubiG</i>             | 54  | G L F G-----K K V L D V C G G-----G G I L A E S M A R E G-----A T V T G L D M G F E P L Q V A K L H A L E S G I-----Q V D Y V O E T V-----E E H A A K H A             | 120 |
| <i>Methanococcus maripaludis MMP1179</i> | 37  | N R F G I T A G N C I D I G S G-----P G A L S I A L A K Q S D F S I R A L D F S K H M N E I A L K N I A D A D L N D R I Q I V O G D V-----H N I P I E                 | 107 |
| <i>Plasmodium falciparum PMT</i>         | 58  | -----K V L D I G S C L G G G C M Y I N E K Y G A H-----T H G I D I C S N I-----V N M A N E R V S G N N K I I F E A N D I L T K E F P E N N F D L I                    | 124 |
| <i>Homo sapiens SAMTOR</i>               | 235 | G E L F H V V V F S L L S Y F P S P Y Q R W I C C K K A H E L L V L N G L L L I I T P D S S H Q N R H A M M K S W K I A I E S L G F K R F - K Y S K F S H M H L       | 315 |
| <i>Escherichia coli ubiG</i>             | 121 | G Q Y-----D V V T C M E M-----E H V P D P Q S-----V V R A C A Q L V K P G G D V F F S T L N R N G K S W L M A V V G A E Y I L R M V P K G T H D V K - K F I K P A E L | 197 |
| <i>Methanococcus maripaludis MMP1179</i> | 108 | D N-----A D L I V S R G S F F W E D V T T-----A F R E I Y R I L K S G G K T Y I G-----G G F G N K E L R D S I S A E - M I R K N P D W K E F N R - K N I S Q E N V     | 182 |
| <i>Plasmodium falciparum PMT</i>         | 125 | --Y S R D A I L H L S L E N K N L F Q-----K C Y K W L K P T G T L L I-----T D Y C A T E K E N W D D E-----F K E Y V K O R K Y T L I T V                               | 186 |
| <i>Homo sapiens SAMTOR</i>               | 316 | M A F R X I S L K T T S D L V S R N Y P G M L Y I P Q D F N S I E D E E Y S N P S C Y V R S D I E D E Q L A Y G-----F T E L P D-----A P Y D S D S G E S Q A S S I     | 392 |
| <i>Escherichia coli ubiG</i>             | 198 | L G V V D Q T S L K E R H I T G L H Y N P I T N T F K-----L G P G V D V N Y M L H T Q N K-----                                                                        | 240 |
| <i>Methanococcus maripaludis MMP1179</i> | 183 | E R F-----Q N V L D E I G V S S-----Y E I I L E-----D E G F W I I I S K T D Q E V I-----S L D D G W S R K I K D S K R K M Q R W G                                     | 218 |
| <i>Plasmodium falciparum PMT</i>         | 187 | E E Y A D I-----L T A C N F K N V-----V S K D L S D Y W N Q L L E V E H K Y L H E N K E E F L K L F S E K K F I S L D D G W S R K I K D S K R K M Q R W G             | 259 |
| <i>Homo sapiens SAMTOR</i>               | 393 | P F Y E L E D P I L L L S                                                                                                                                             | 405 |
| <i>Escherichia coli ubiG</i>             |     | -----                                                                                                                                                                 |     |
| <i>Methanococcus maripaludis MMP1179</i> |     | -----                                                                                                                                                                 |     |
| <i>Plasmodium falciparum PMT</i>         | 260 | Y F K A T K N-----                                                                                                                                                    |     |
