# Supplementary material
Source: PubMed Central journal article supplement (PMC5747364)

# Figure S1

## A

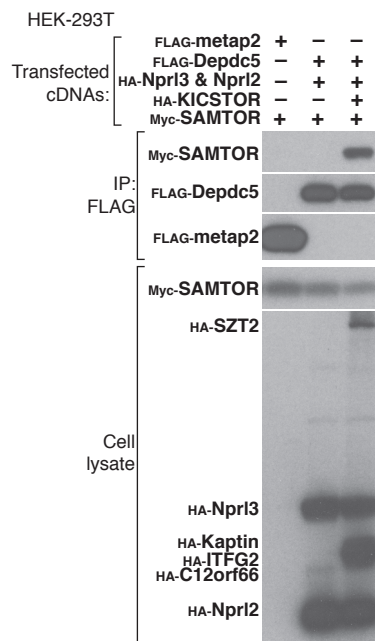

Supplement: NIHMS925589-supplement-Supp_figure_1.pdf [file NIHMS925589-supplement-Supp_figure_1.pdf]

# Figure S3

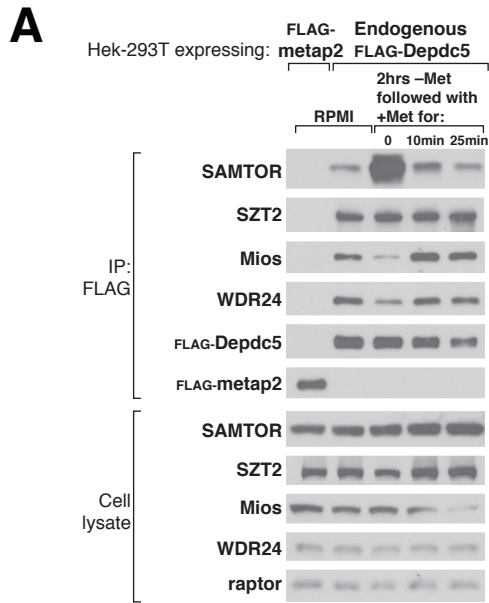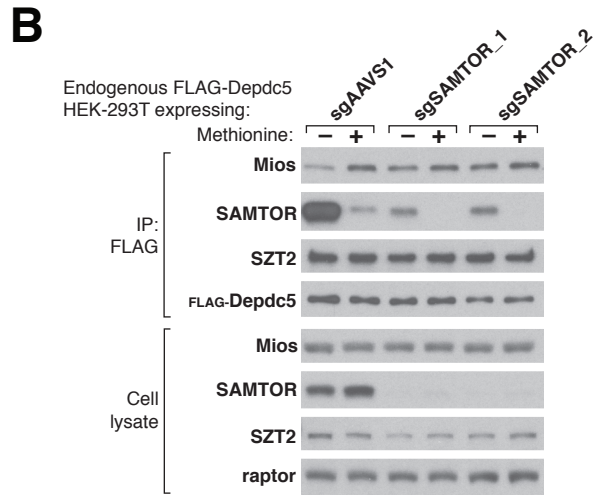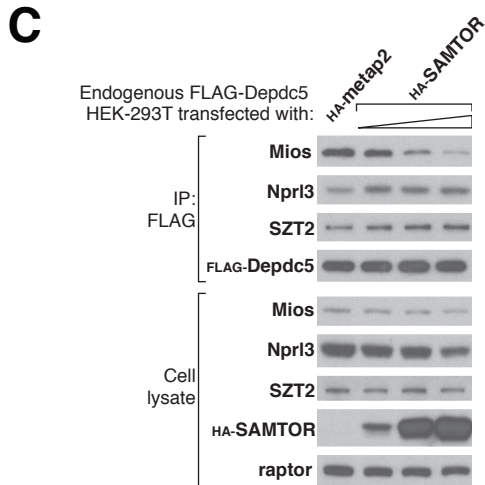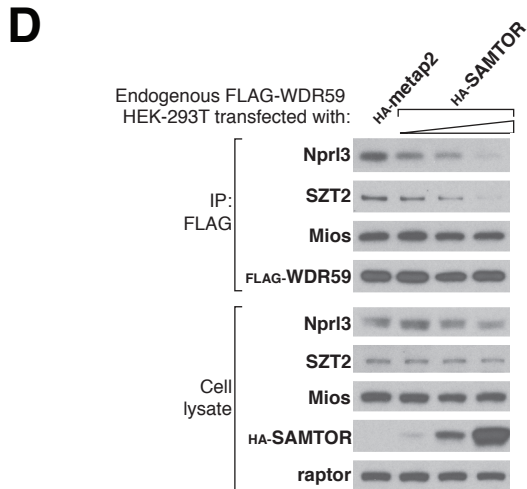

Supplement: NIHMS925589-supplement-Supp_figure_3.pdf [file NIHMS925589-supplement-Supp_figure_3.pdf]

# Figure S4

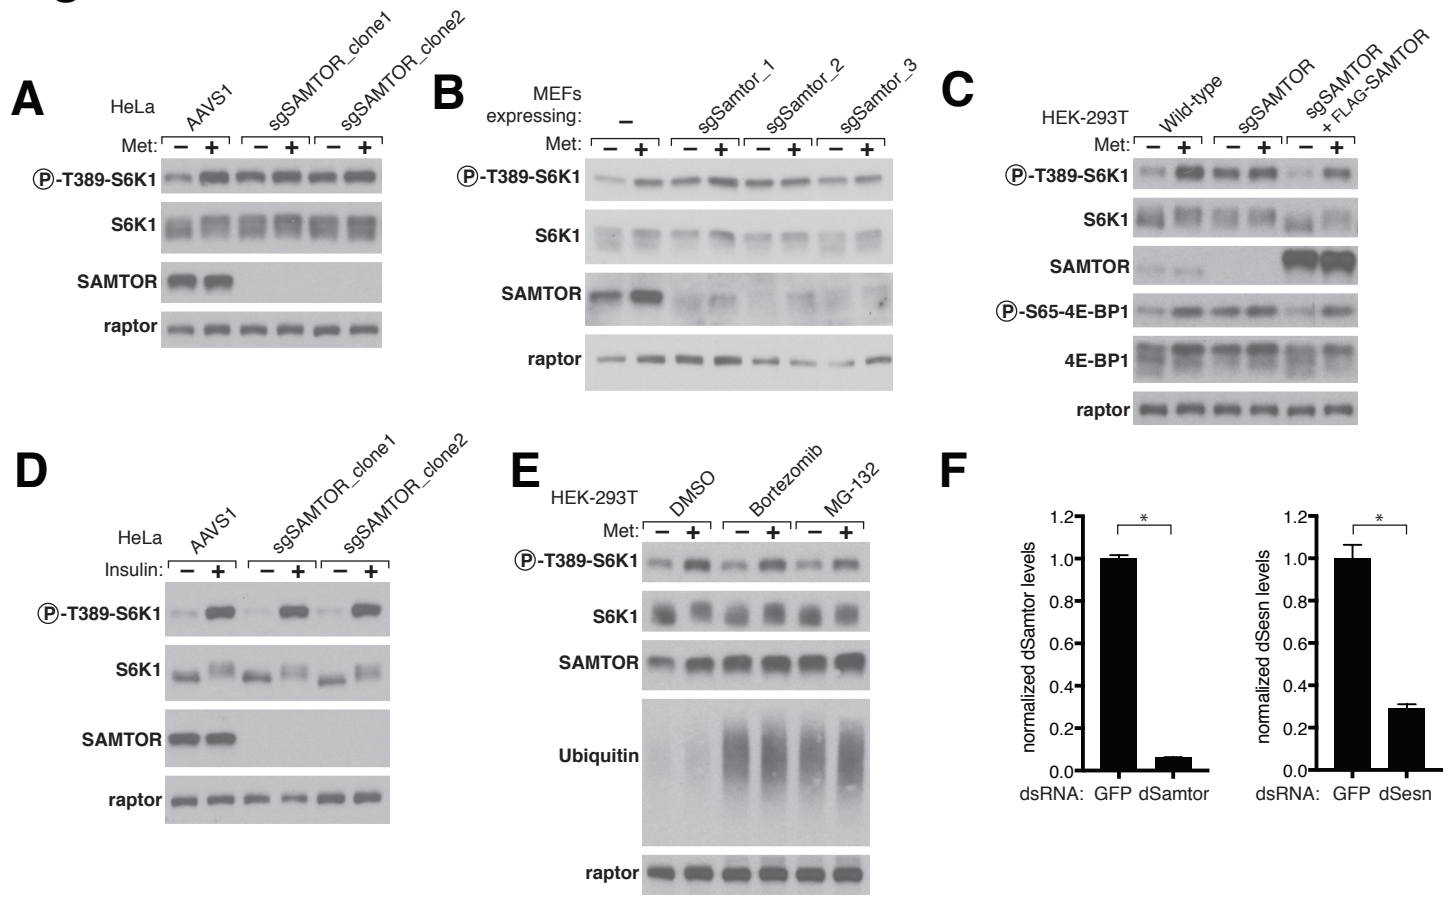

Supplement: NIHMS925589-supplement-Supp_figure_4.pdf [file NIHMS925589-supplement-Supp_figure_4.pdf]
